# Supplementary material for: Probing the adverse temperature dependence in the static fluorescence quenching of BSA induced by a novel anticancer hydrazone
Source: Royal Society of Chemistry journal article supplement (doi:10.1039/c2pp25162k), 2012-08-01

**Probing the adverse temperature dependence in the static  
fluorescence quenching of BSA induced by a novel anticancer  
hydrazone**

**Content:**

**Figure S1.** The IR spectrum of HHB

**Figure S2.**  $^1\text{H}$  NMR of HHB

**Figure S3.** MS of HHB

**Figure S1.** The IR spectrum of HHB

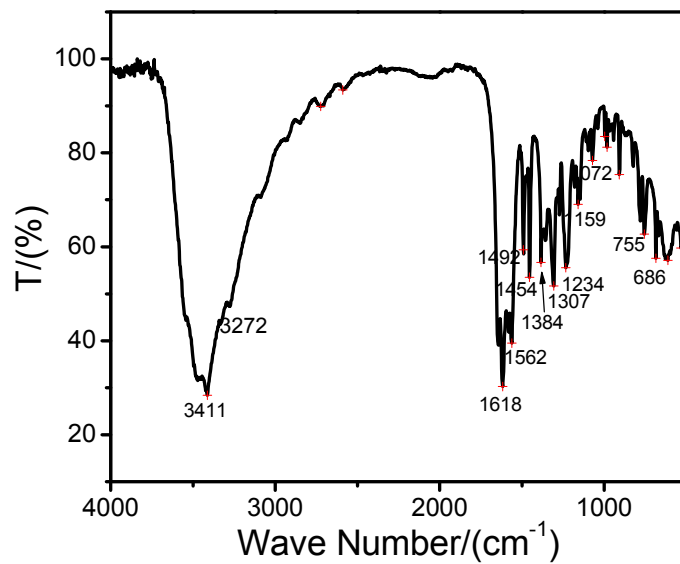

Figure S2.  $^1\text{H}$  NMR of HHB

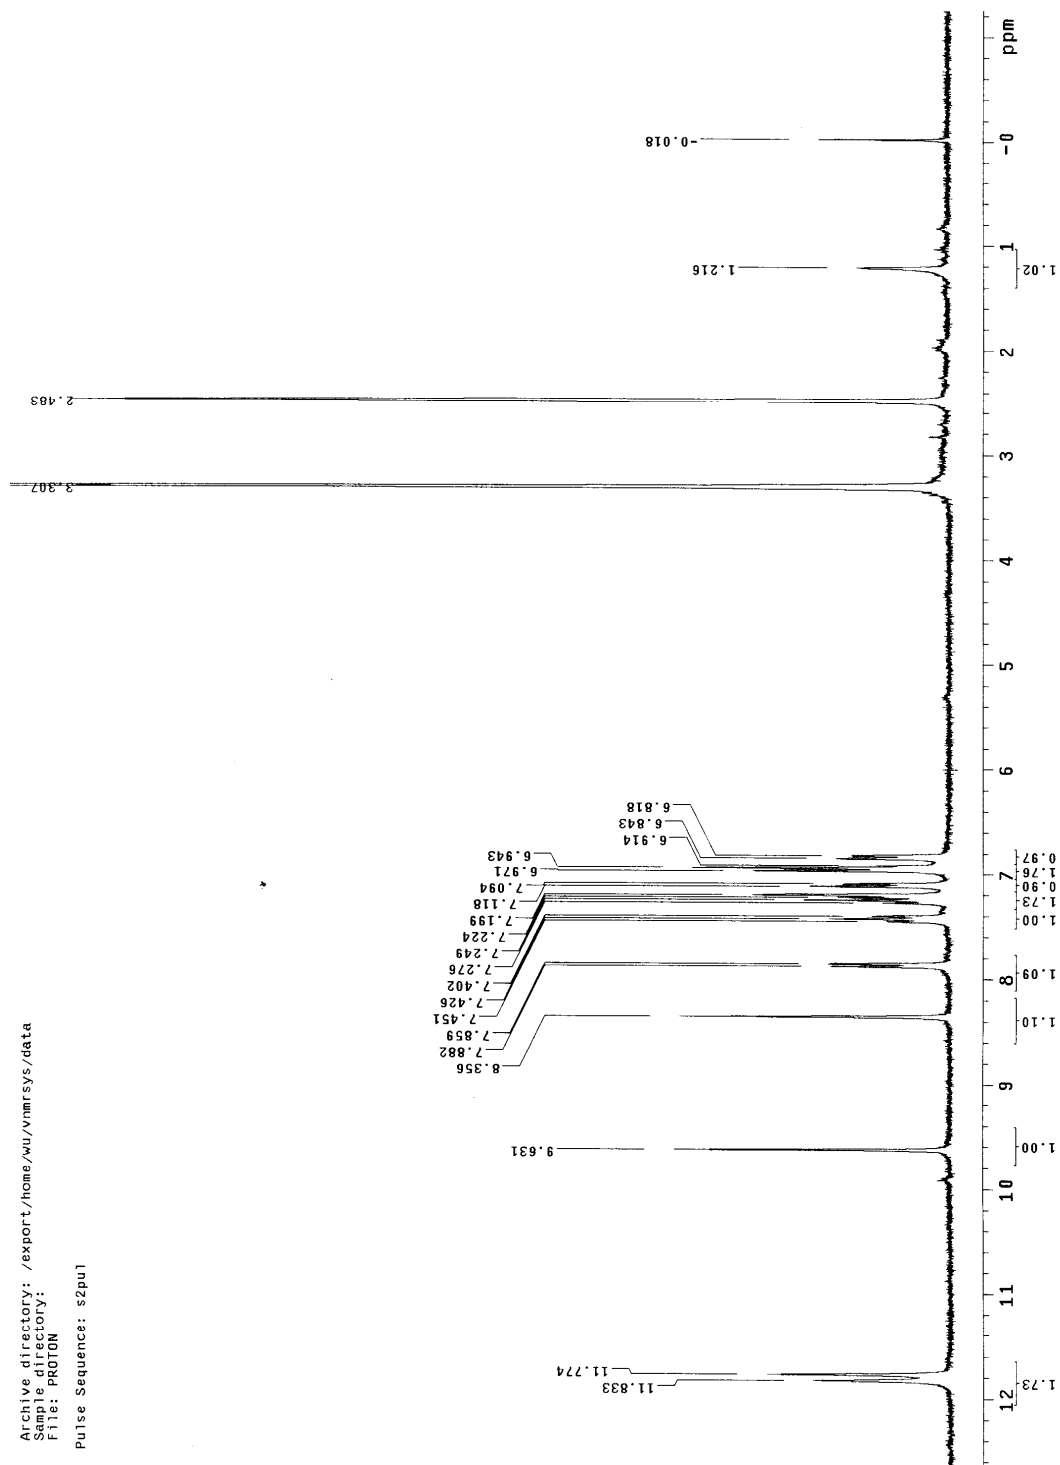

Figure S3. MS of HHB

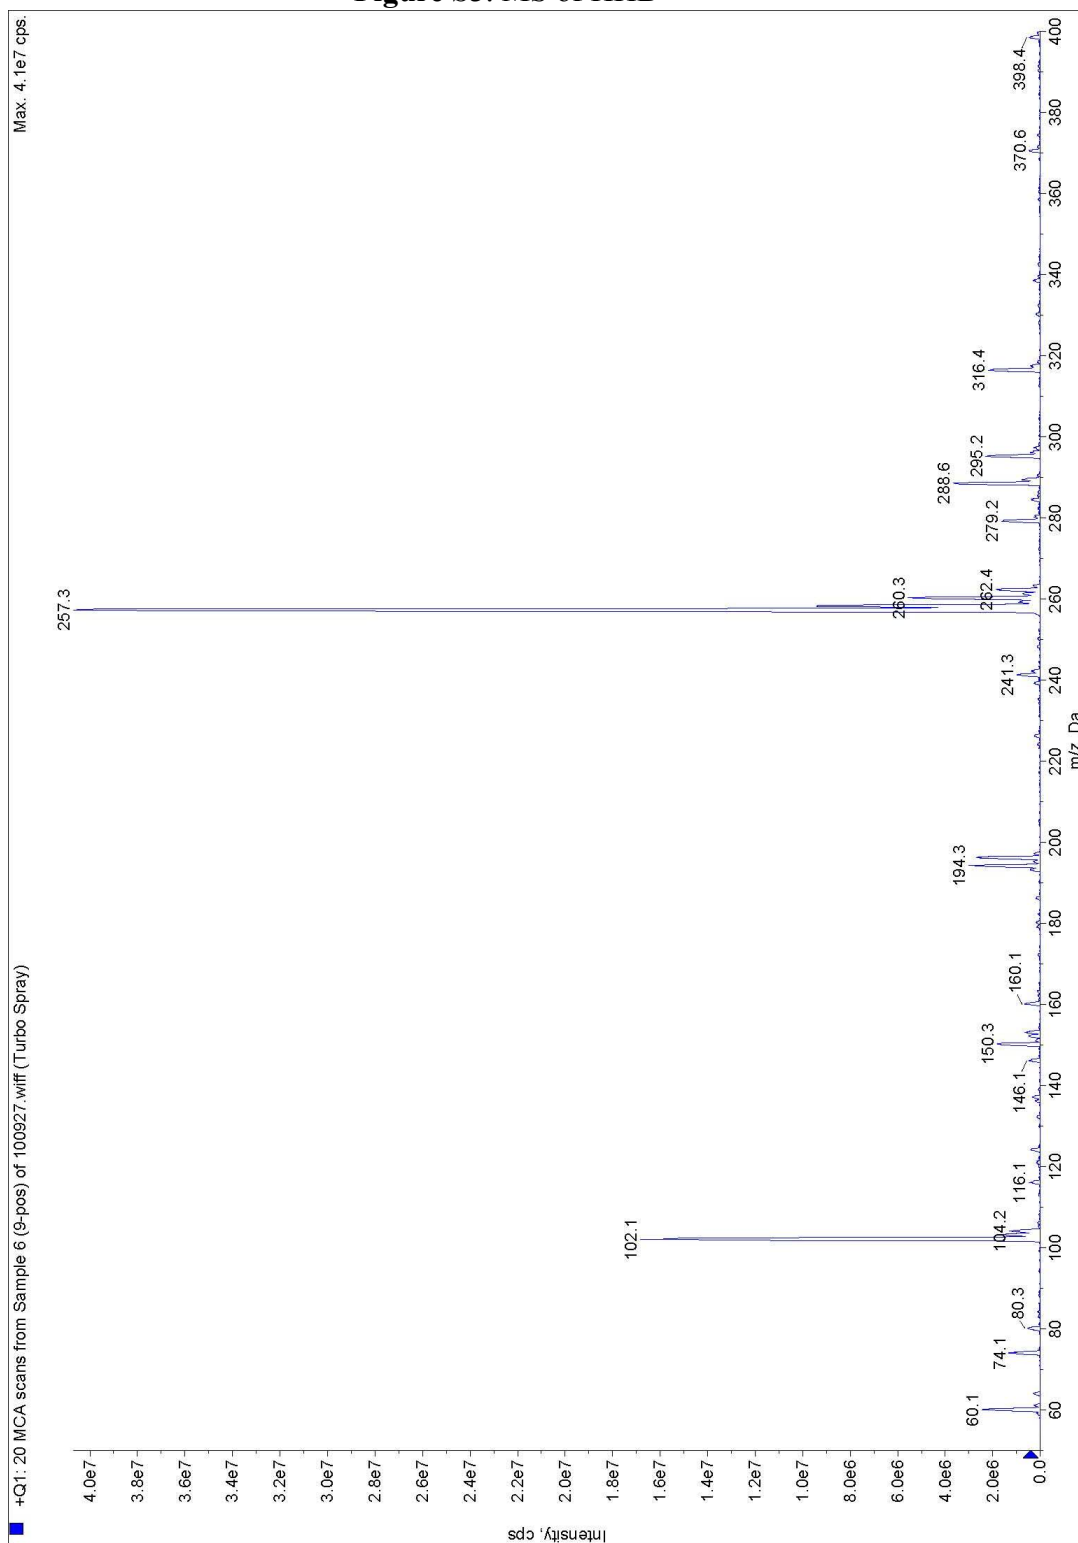

Supplement: c2pp25162k.pdf [file c2pp25162k.pdf]
